# Supplementary material for: Sequences Related to Chimay Rhabdovirus Are Widely Distributed in Ixodes ricinus Ticks across England and Wales
Source: MDPI journal article supplement (doi:10.3390/v16040504), 2024-03-26
Supplement: s1 [file s1]

**Table S1.** Summary of ticks collected during a field survey in Cornwall, UK, 2021.

| Field           | Grassland        | Male | Female | Nymph |
|-----------------|------------------|------|--------|-------|
| 1 & 2           | Improved pasture | 3    | 0      | 81    |
| 3               | Improved pasture | 2    | 3      | 9     |
| 4 (River Field) | Rough grazing    | 3    | 4      | 45    |

**Table S2.** Information on host and taxonomic assignments (if available) of the rhabdoviruses used to infer the phylogenetic tree in Figure 2B.

| ID        | Virus                             | Host                                                                    | Subfamily              | Genus              | Species                      |
|-----------|-----------------------------------|-------------------------------------------------------------------------|------------------------|--------------------|------------------------------|
| NC_001498 | Measles virus                     |                                                                         | [Paramyxovirus family] | Morbillivirus      | Morbillivirus hominis        |
| MF360790  | Blacklegged tick rhabdovirus-1    | Ixodes scapularis                                                       | unassigned             | Betaricinrhavirus  | Betaricinrhavirus scapularis |
| MF360791  | Dog Tick rhabdovirus-1            | Ixodes scapularis                                                       | not available          | not available      | not available                |
| MF975531  | Chimay rhabdovirus                | Ixodes ricinus                                                          | unassigned             | Betaricinrhavirus  | Betaricinrhavirus chimay     |
| MH707450  | Grenada mosquito rhabdovirus 1    | Culex quinquefasciatus                                                  | not available          | not available      | not available                |
| MN095536  | Wuhan Tick Virus 1                | Boophilus sp.                                                           | Alpharhabdovirinae     | Alpharicinrhavirus | Alpharicinrhavirus wuhan     |
| MT181988  | IRE CTVM19-associated rhabdovirus | IRE/CTVM19                                                              | not available          | not available      | not available                |
| MW721934  | Hubei tick rhabdovirus 1          | Haemaphysalis longicornis                                               | Alpharhabdovirinae     | Alpharicinrhavirus | Alpharicinrhavirus hubei     |
| NC_025340 | Long Island tick rhabdovirus      | Amblyomma americanum                                                    | Alpharhabdovirinae     | Sawgrhavirus       | Sawgrhavirus longisland      |
| NC_025342 | Kolente virus                     | Amblyomma (Theileriella) variegatum/Hipposideros jonesi (roundleaf bat) | Alpharhabdovirinae     | Ledantavirus       | Ledantavirus kolente         |
| NC_076266 | Xinjiang tick rhabdovirus         | Hyalomma asiaticum                                                      | Alpharhabdovirinae     | Lostrhavirus       | Lostrhavirus hyalomma        |
| ON408172  | Tahe rhabdovirus 3                | Ixodes persulcatus WZD NE-TH3                                           | not available          | not available      | not available                |

|          |                                       |                         |               |               |               |
|----------|---------------------------------------|-------------------------|---------------|---------------|---------------|
| ON684361 | Dermacentor reticulatus rhabdovirus 1 | Dermacentor reticulatus | not available | not available | not available |
| OP264902 | Culex rhabdovirus                     | Culex pipiens           | not available | not available | not available |
| OP313011 | Alxa tick rhabdovirus                 | not available           | not available | not available | not available |
| OP313012 | Fuyun tick rhabdovirus                | not available           | not available | not available | not available |

**Table S3.** Results of ChiRhabFor/ChiRhabRev PCR tests for the presence of Chimay rhabdovirus RNA in ticks collected in four additional sites across England and Wales between 2014 and 2018.

| Dartmoor (Southwest England) |                    |             | Snowdonia (Wales)  |             | Bowland and Whitewater (North England) |             | Exmoor             |          |
|------------------------------|--------------------|-------------|--------------------|-------------|----------------------------------------|-------------|--------------------|----------|
| Year                         | Nr of ticks tested | Positive    | Nr of ticks tested | Positive    | Nr of ticks tested                     | Positive    | Nr of ticks tested | Positive |
| 2014                         | 4                  | 2           |                    |             | 3                                      | 0           | 10                 | 1        |
| 2015                         | 6                  | 4           | 4                  | 1           |                                        |             | 2                  | 0        |
| 2016                         | 1                  | 0           | 13                 | 6           | 14                                     | 2           | 4                  | 0        |
| 2017                         | 3                  | 1           | 5                  | 2           |                                        |             | 4                  | 0        |
| 2018                         | 17                 | 4           | 2                  | 0           | 4                                      | 2           |                    |          |
| <b>Total</b>                 | <b>31</b>          | <b>11</b>   | <b>24</b>          | <b>9</b>    | <b>21</b>                              | <b>4</b>    | <b>20</b>          | <b>1</b> |
| %                            |                    | <b>29.0</b> |                    | <b>37.5</b> |                                        | <b>19.1</b> |                    | <b>5</b> |
